1 **Human hippocampal theta oscillations reflect sequential dependencies during spatial**  
2 **planning.**

3

4 Raphael Kaplan<sup>1,2</sup>, Adrià Tauste Campo<sup>3-5</sup>, Daniel Bush<sup>6,7</sup>, John King<sup>6,8</sup>, Alessandro Principe<sup>2</sup>,  
5 Raphael Koster<sup>1,6</sup>, Miguel Ley-Nacher<sup>3</sup>, Rodrigo Rocamora<sup>3</sup>, & Karl J. Friston<sup>1</sup>

6

7 1-Wellcome Centre for Human Neuroimaging, UCL Institute of Neurology, University College  
8 London, 12 Queen Square, London, United Kingdom, WC1N 3BG.

9 2-Egil and Pauline Braathen and Fred Kavli Centre for Cortical Microcircuits, Kavli Institute  
10 for Systems Neuroscience, Norwegian University of Science and Technology, Olav Kyrres gate  
11 9, Trondheim, Norway 7030

12 3-Center for Brain and Cognition, Department of Information and Communication  
13 Technologies, Universitat Pompeu Fabra, Edifici Merce Rodereda, C/ Ramón Trias Fargas,  
14 25, Barcelona, Spain 08018.

15 4-Epilepsy Unit, Department of Neurology, Hospital del Mar Medical Research Institute  
16 (IMIM), Dr. Aiguader 88, Barcelona, Spain 08003.

17 5-Barcelonaβeta Brain Research Center, Pasqual Maragall Foundation, C/ Wellington 30,  
18 Barcelona, Spain 08005.

19 6-UCL Institute of Cognitive Neuroscience, University College London, 17 Queen Square,  
20 London, United Kingdom, WC1N 3AZ.

21 7-UCL Queen Square Institute of Neurology, University College London, London, United  
22 Kingdom, WC1N 3BG.

23 8- Clinical, Education and Health Psychology, University College London, 1-19 Torrington  
24 Place, London, United Kingdom, WC1E 7HB.

25 **Corresponding Author:** Raphael Kaplan; email: raphael.s.m.kaplan@ntnu.no, Egil and  
26 Pauline Braathen and Fred Kavli Centre for Cortical Microcircuits, Kavli Institute for Systems  
27 Neuroscience, Norwegian University of Science and Technology Olav Kyrres gate 9,  
28 Trondheim, Norway 7030

29 **Conflict of interest:** The authors declare no competing financial interests.

30

31 **Acknowledgements:** The research was supported by a Sir Henry Wellcome Postdoctoral  
32 Fellowship to RKa (Ref: 101261/Z/13/Z) and a Wellcome Principal Research Fellowship to  
33 KJF (Ref: 088130/Z/09/Z). We thank Carmen Pérez Enríquez for helpful discussion and the  
34 staff at Hospital del Mar for help with patients. We would also like to thank David Bradbury  
35 and Letty Manyande for assistance with MEG experimental setup. We also thank the Wellcome  
36 Centre for Human Neuroimaging for providing facilities.

37

38

39

40

41

42

43

44

45

46

47

48

49

50

51

52

53

54

55

56

57 **Abstract**

58 Movement-related theta oscillations in rodent hippocampus coordinate ‘forward sweeps’ of  
59 location-specific neural activity that could be used to evaluate spatial trajectories online. This  
60 raises the possibility that increases in human hippocampal theta power accompany the  
61 evaluation of upcoming spatial choices. To test this hypothesis, we measured neural oscillations  
62 during a spatial planning task that closely resembles a perceptual decision-making paradigm.  
63 In this task, participants searched visually for the shortest path between a start and goal location  
64 in novel mazes that contained multiple choice points, and were subsequently asked to make a  
65 spatial decision at one of those choice points. We observed ~4-8 Hz hippocampal/medial  
66 temporal lobe theta power increases specific to sequential planning that were negatively  
67 correlated with subsequent decision speed, where decision speed was inversely correlated with  
68 choice accuracy. These results implicate the hippocampal theta rhythm in decision tree search  
69 during planning in novel environments.

70

71

72

73

74

75

76

77

78

79

80

81

82

83

84

## 85 **Introduction**

86           Recent evidence has linked the hippocampus with planning in rodents (Miller et al.,  
87 2017) and humans (Kaplan et al., 2017a). Moreover, changes in hippocampal theta power  
88 (approx. 4-8Hz in humans) have been observed during memory-guided decision-making in  
89 well-learned environments in both species (Guitart-Masip et al., 2013; Schmidt et al., 2013;  
90 Belchior et al., 2014). However, it remains unclear whether changes in hippocampal theta  
91 power are associated with planning in novel environments. Notably, rodent type I movement-  
92 related hippocampal theta oscillations (Vanderwolf, 1969) are linked to sweeps of place cell  
93 activity produced by hippocampal theta phase precession (O'Keefe & Recce, 1993). It has been  
94 hypothesized that these 'theta sweeps' could serve as a mechanism to plan trajectories online  
95 (Johnson & Redish, 2007; Wikenheiser & Redish, 2015; Watrous et al., 2018). This raises the  
96 possibility that similar increases in human hippocampal theta power are induced by the  
97 planning of forward trajectories.

98           To investigate the role of the hippocampal theta rhythm in online spatial planning (i.e.,  
99 the search of decision trees), we created a spatial task that required little to no learning, in which  
100 participants could draw upon their experience in the physical world (Kaplan et al., 2017a). We  
101 tested human participants on this task while recording from the hippocampus either invasively,  
102 using intracranial electroencephalography (iEEG); or non-invasively, using whole-head  
103 magnetoencephalography (MEG). In both cases, participants were instructed to search for the  
104 shortest path between a start and goal in novel mazes that afforded multiple paths. Participants  
105 were then asked which direction they would take from one of two choice points along the  
106 shortest path (Fig. 1).

107



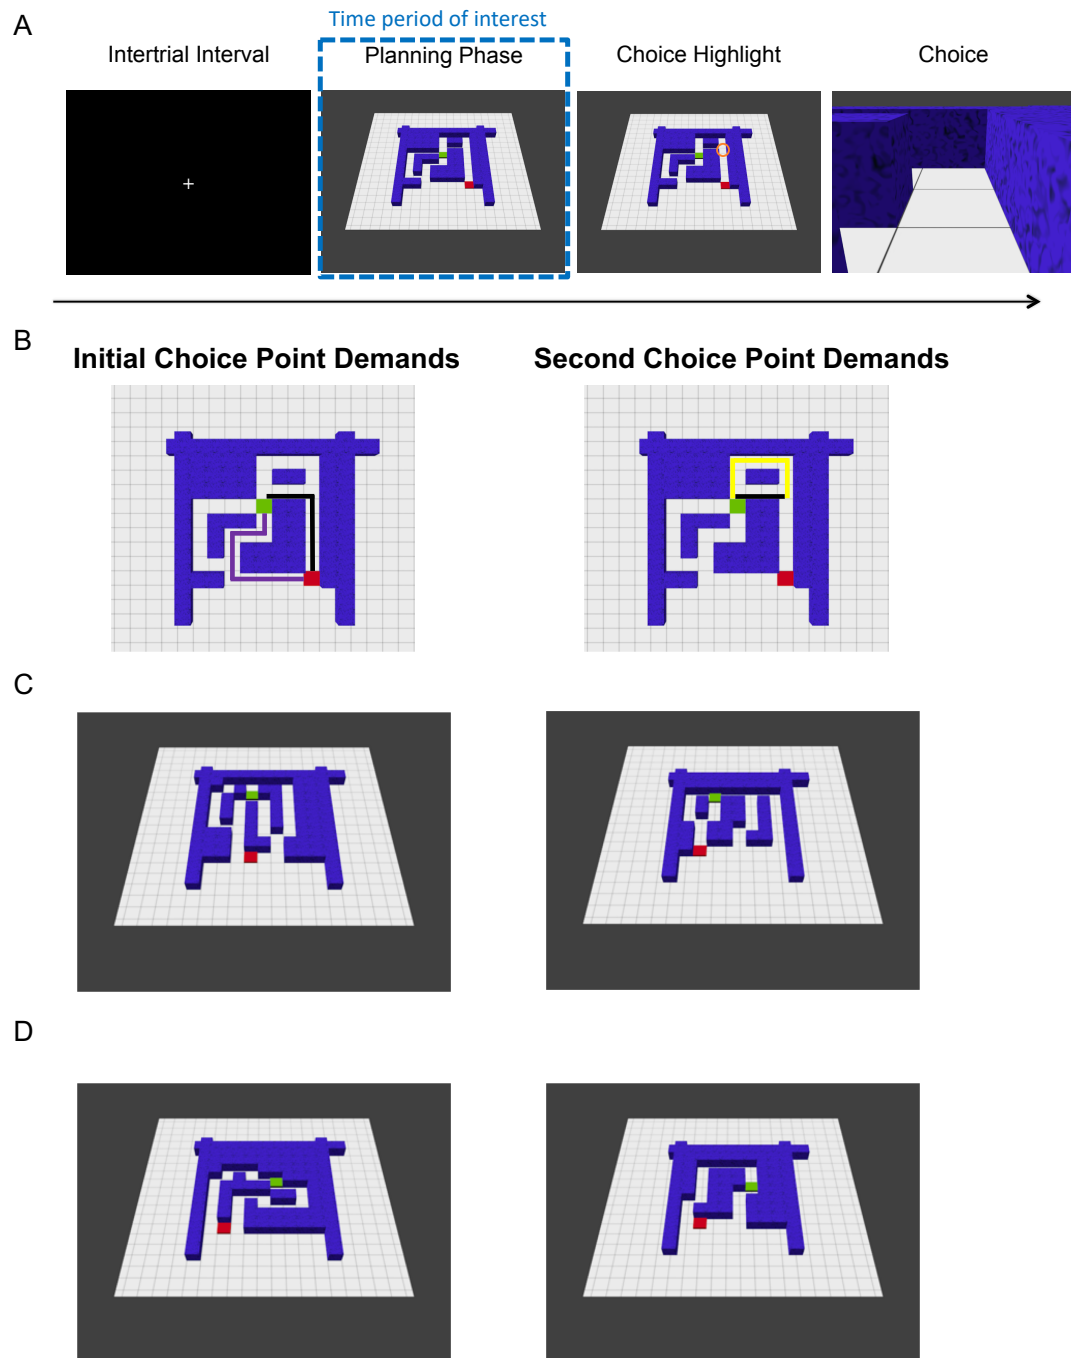

108  
 109 **Fig 1. Task.** A. Each trial (i.e., visually presented maze) began with an inter-trial interval (ITI)  
 110 of 1.5s. Next, during a 3.25s planning phase, participants had to infer the shortest path from a  
 111 start point (red square) to a goal location (green square) and remember the chosen direction for  
 112 each choice point along the shortest path. A choice point was subsequently highlighted (choice  
 113 highlight) for 250ms. This was either the first (i.e. initial) or second (i.e. subsequent)  
 114 choice point along the shortest path. Participants were then asked which direction (e.g., left or forward)  
 115 they would take at that choice point during a choice period that was cued by a first-person  
 116 viewpoint of the highlighted location. Participants had a maximum of 1.5 s to make their choice  
 117 using a button box. B. Overhead view (not shown during the experiment) of the maze in A,  
 118 indicating which path lengths contribute to initial and second choice point demands (black line  
 119 represents shortest path). C. Left: Example sequential planning trial with a small path length  
 120 difference (demanding) at the red square/initial choice point and large (less demanding) path  
 121 length difference at the second choice point. Right: Example trial with a large (less demanding)

122 path length difference at the red square/initial choice point and small (demanding) path length  
123 difference at the second choice point. D. Left: Example non-sequential (control) trial with a  
124 small path length difference (demanding). Right: Example non-sequential (control) trial with a  
125 large path length difference (less demanding).  
126

127           Crucially, the mazes were designed to induce forward planning in terms of a two-level  
128 tree search, where participants needed to maintain the decisions they made at each choice point.  
129 At both choice points, there was a small, medium, or large path length difference – creating a  
130 total of (3x3) nine conditions allowing us to test the effect of planning demands at each choice  
131 point depth (i.e., initial or second). In parallel, our task also contained a non-sequential control  
132 condition, where participants were presented with mazes containing only one choice point (Fig.  
133 1D). In either case, we associate a smaller path difference with greater ambiguity and  
134 processing demands. Importantly, in any trial, participants were only prompted to make one  
135 choice after seeing the full maze; however, until the choice point was highlighted, they did not  
136 know which decision (i.e. either the initial or second/subsequent choice point along the correct  
137 path for sequential mazes) would be probed in sequential planning trials (Fig. 1). After planning  
138 their route, participants were asked to choose—at a specified choice point—the direction of the  
139 shortest path to the goal location (Fig. 1). This provided a measure (reaction time, RT) with  
140 which to quantify their (subjective) uncertainty to complement the (objective) difference in path  
141 lengths. This design allowed us to ask whether hippocampal theta power is selectively related  
142 to demands at specific choice points and how the theta rhythm relates to successful sequential  
143 spatial planning.

144

## 145 **Results**

### 146 *Behavioral Performance*

147           Twenty-two participants in the MEG study made correct choices on  $87.9 \pm 6.13\%$  of  
148 sequential planning trials (mean  $\pm$  SD; control trials:  $86.4 \pm 4.95\%$ ), with an average reaction  
149 time (RT) of  $469 \pm 99\text{ms}$  (control trials:  $363 \pm 112\text{ms}$ ). Paired t-tests showed that their RT was  
150 significantly higher for sequential than non-sequential (i.e. control) trials ( $t(21)=9.55$ ;  $p<.001$ ),  
151 without any difference in accuracy ( $t(21)=1.42$ ;  $p=.171$ ). In addition, RTs were strongly

152 inversely correlated with accuracy across MEG participants in both sequential ( $t(21)=-5.72$ ;  
153  $p<0.001$ ) and non-sequential control trials ( $t(21)=-5.72$ ;  $p<0.001$ ). After accounting for planning  
154 demands induced by the path length differences at each choice point (mean path length  
155 differences at the two choice points), RTs were still negatively correlated with accuracy in both  
156 sequential ( $t(21)=-5.25$ ;  $p<0.001$ ) and non-sequential control trials ( $t(21)=-5.14$ ;  $p<0.001$ ). In  
157 other words, participants responded faster when they made accurate choices. Moreover, these  
158 results demonstrate that RTs directly relate to accurate performance on the spatial planning  
159 task.

160 We then asked whether accuracy and RT were specifically influenced by path length  
161 differences and choice point depth, with the aim of disentangling the effects of first/initial  
162 versus second/subsequent choice point demands on planning accuracy and RT. Using a  
163 repeated measures ANOVA, we looked for an effect of path length difference and choice point  
164 depth on accuracy and RTs in MEG participants. We observed a main effect of path length on  
165 both accuracy ( $F(2,20)=9.09$ ;  $p=.002$ ; Fig. 2A) and RTs ( $F(2,20)=5.06$ ;  $p=.017$ ; Fig. 2B), driven  
166 by higher accuracy and faster RTs for larger path length differences; as well as a significant  
167 interaction between initial (i.e. first) and second (i.e. subsequent) choice points and path length  
168 differences on both accuracy ( $F(4,18)=11.0$ ;  $p<0.001$ ) and RTs ( $F(4,18)=4.75$ ;  $p=0.009$ ). Post-  
169 hoc t-tests revealed that this interaction resulted from medium path length differences being  
170 significantly less demanding (i.e. producing higher accuracy and faster RTs) when they were  
171 at the initial, as opposed to the second, choice point (Accuracy:  $t(21)=3.62$ ;  $p=.002$ ; RT:  $t(21)=-$   
172  $4.17$ ;  $p<0.001$ ).

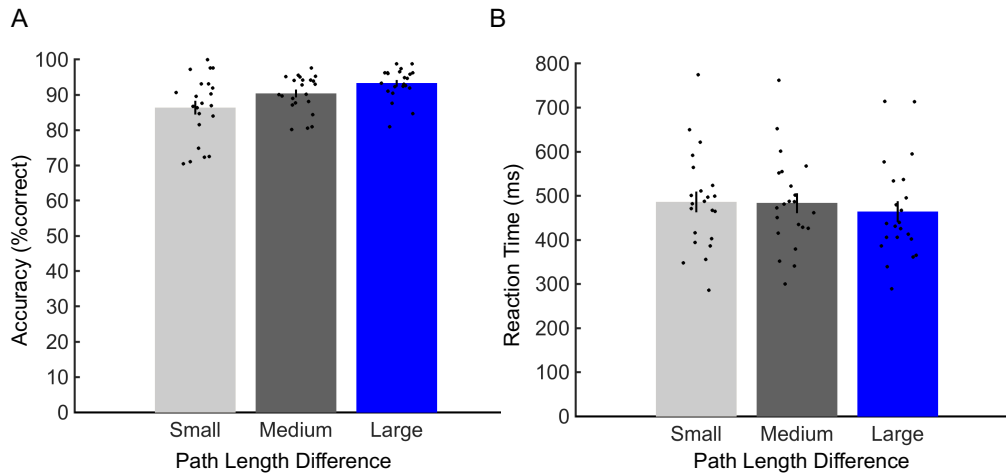

173 **Figure 2: Behavior** A. Accuracy. Left: Significant main effect ( $p=0.002$ ) of path length  
 174 differences (small, medium, and large) on choice accuracy, collapsed across first and second  
 175 choice points. B. Reaction time. Significant main effect ( $p=0.017$ ) of path length differences  
 176 (small, medium, and large) on reaction times, collapsed across initial and second choice point.  
 177 All error bars show  $\pm$  SEM.  
 178  
 179  
 180

181 *MEG Analyses*

182 Using MEG source reconstruction, we asked whether power changes in five canonical  
 183 frequency bands (delta / low theta: 1-3 Hz, theta: 4-8Hz, alpha: 9-12Hz, beta: 13-30Hz, and  
 184 gamma: 30-80Hz) anywhere in the brain were related to differences in spatial planning.  
 185 Focusing on RTs, we found a significant negative correlation between 4-8Hz theta power  
 186 during the sequential planning phase and subsequent RTs in a left hippocampal cluster ( $x:-36$ ,  
 187  $y:-20$ ,  $z:-20$ ,  $t(21)=-4.28$ ; small volume corrected (SVC) peak-voxel  $p=.011$ ; Fig. 3A).  
 188 Specifically, increased hippocampal theta power during planning periods preceded faster  
 189 decisions – an effect that was also observable at the scalp level (Fig. 3C). Notably, we did not  
 190 observe any correlation between theta power and trial-by-trial choice accuracy anywhere in the  
 191 brain, although this is likely due to a relatively small number of errors.

192 In addition, we found a significant negative correlation between theta power and RTs  
 193 in the right ventral temporal lobe ( $x:36$ ,  $y:-42$ ,  $z:-26$ ;  $t(21)=4.49$ ; family wise error (FWE)  
 194 corrected peak-voxel  $p=.012$ ; Fig. S1), which extended into posterior parahippocampal cortex.  
 195 We did not observe a significant positive correlation between 4-8Hz planning period theta  
 196 power and subsequent RTs anywhere in the brain. Elsewhere, we observed 9-12Hz alpha power

197 changes in the right occipital lobe/cerebellum that negatively correlated with RT (x:28, y:-70,  
198 z:-22;  $t(21)=-5.99$ ; FWE corrected peak-voxel  $p=.014$ ; Fig. S1). However, we observed no  
199 other significant correlations between oscillatory power and RT in any other brain regions or  
200 frequency band.

201 To assay whether significant power changes related specifically to sequential planning,  
202 we tested whether each correlation described above was stronger for sequential planning trials  
203 versus non-sequential/control trials. Using a 10mm sphere around the respective peak voxels,  
204 we observed that hippocampal RT theta effects selectively corresponded to sequential planning  
205 ( $t(21)=-2.33$ ;  $p=.03$ ; Fig. 3D), while right ventral temporal/parahippocampal theta ( $t(21)=-1.38$ ;  
206  $p=.181$ ; Fig. S1) and occipital/cerebellar alpha effects did not ( $t(21)=-1.74$ ;  $p=.095$ ; Fig. S1).

207 We then asked whether sequential spatial planning was associated with a general  
208 increase in left hippocampal theta power. Again, using a 10mm sphere around the left  
209 hippocampal peak, we observed a significant increase in 4-8Hz hippocampal theta power in  
210 this region during the sequential planning period versus ITI ( $t(21)=3.74$ ;  $p=.001$ ; Fig. 3E).  
211 Conducting the same sequential planning versus ITI analysis in the other areas exhibiting RT  
212 effects, we observed significant increases in both ventral temporal lobe theta ( $t(21)=2.79$ ;  
213  $p=.011$ ) and occipital alpha ( $t(21)=4.44$ ;  $p<.001$ ) power during sequential planning.

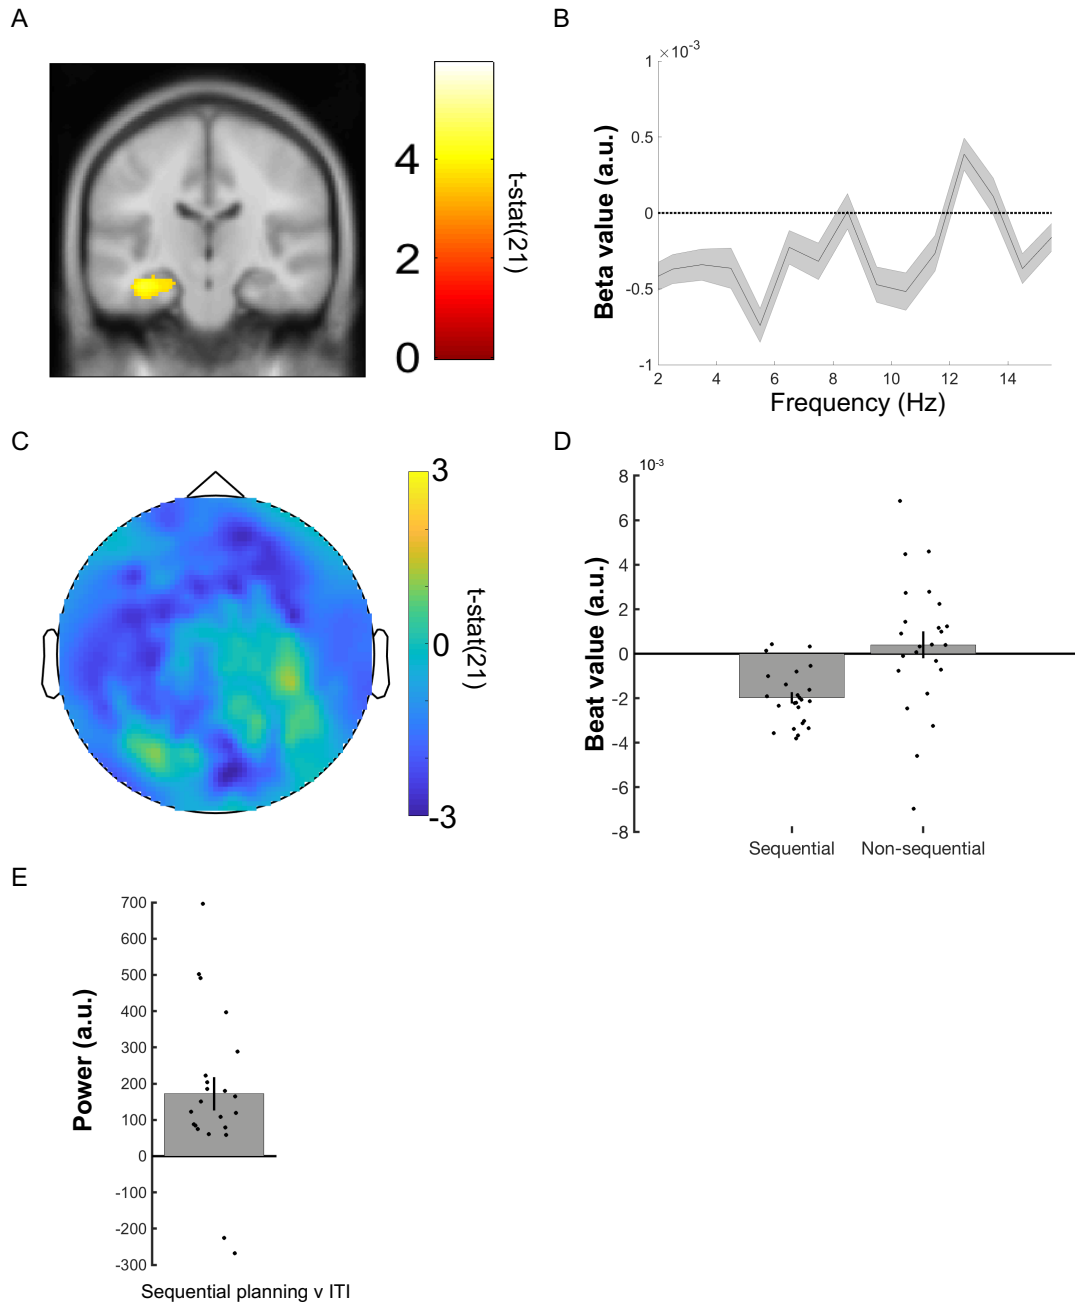

214  
 215  
 216  
 217  
 218  
 219  
 220  
 221  
 222  
 223  
 224  
 225  
 226  
 227

**Fig. 3 Reaction time correlation with MEG theta power.**

A. Linearly Constrained Minimum Variance (LCMV) beamformer source reconstruction image showing significant 4-8 Hz left hippocampal theta power source negative correlation with RT ( $x$ :-36,  $y$ :-20,  $z$ :-20) in 22 healthy participants. Images displayed at the statistical threshold of  $p < 0.001$  uncorrected for visualization purposes. B. Beta value spectrum from 1 to 15 Hz for hippocampal RT theta power effect showing peak negative correlation in the 4-8 Hz theta band. C. Negative 4-8 Hz theta power correlation with RT shown at the scalp level for 22 healthy participants. D. Data from a 10 mm sphere around left hippocampal peak voxel from RT contrast for both sequential and non-sequential/control planning trials. E. Data from a 10 mm sphere around left hippocampal peak voxel from RT contrast showing increased theta power during planning phase versus the ITI period. All error bars show  $\pm$  SEM.

228 Finally, isolating hippocampal theta power changes, we tested for the effects of  
229 processing demands (path length differences) at initial and second/subsequent choice points  
230 (e.g., quicker RT for mazes with less demanding initial choice points). Using a repeated  
231 measures ANOVA (path length difference by choice point depth), we tested whether the left  
232 hippocampal region (exhibiting a theta power correlation with RT) also showed an effect of  
233 path length differences at initial versus second choice points related to RT. We did not observe  
234 any significant effect of path length difference by choice point depth in the left hippocampus  
235 ( $F(4,18)=1.79$ ;  $p=.175$ ), or any other brain region.

236

### 237 *Hippocampal depth recordings*

238 Next, to verify our source reconstructed MEG effects, we examined changes in low  
239 frequency oscillatory power during the 3.25s sequential planning period using iEEG recordings  
240 from hippocampal depth electrodes (Fig. 4A) of a single high performing pre-surgical epilepsy  
241 patient (95.5% accuracy; mean RT:  $423 \pm 123$ ms). Notably, a hippocampal theta rhythm was  
242 readily visible in the raw iEEG traces during this planning phase (Fig. 4B). Further validating  
243 our MEG results, we asked whether iEEG hippocampal theta power during sequential planning  
244 correlated with the patient's subsequent RT. Interestingly, we observed a negative correlation  
245 between ~3-6 Hz hippocampal theta power during the 3.25s planning phase and subsequent RT  
246 ( $r=-0.194$ ;  $p=.043$ ; Fig. 4C), although this result should be interpreted with caution given the  
247 relatively small number of measurements. Overall, we observed hippocampal oscillations  
248 during the sequential planning period that were most prominent in the theta band and exhibited  
249 power increases in the same frequency band that correlated with faster subsequent RT in the  
250 MEG dataset.

251

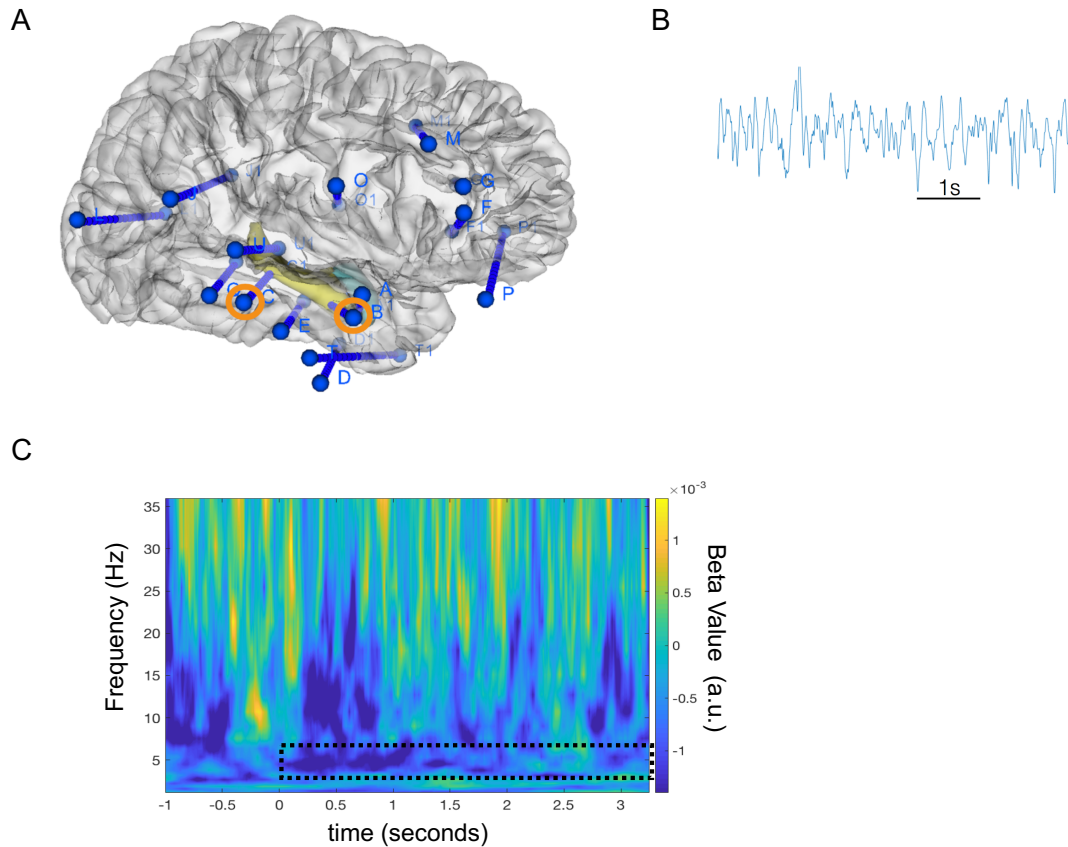

252  
 253 **Fig. 4 Intracranial EEG data from hippocampal depth electrodes** A. Image of electrode  
 254 locations in the patient overlaid on 3D brain template. Right hippocampal depth electrodes with  
 255 contacts used in the present analyses are highlighted in orange. B. Sample raw trace showing  
 256 prominent ongoing theta band oscillations during the spatial planning task. C. Time-frequency  
 257 plot showing a negative correlation over trials between subsequent reaction time (RT) and 3-6  
 258 Hz theta power during sequential planning period (highlighted with dotted black box) averaged  
 259 across both hippocampal contacts.  
 260

## 261 Discussion

262 We examined how the human hippocampal theta rhythm relates to planning sequential  
 263 decisions in novel environments. Linking hippocampal theta to participants' performance on a  
 264 spatial planning task, theta power during the planning phase correlated with faster subsequent  
 265 spatial decisions in MEG and iEEG participants (Figs. 3 & 4). Furthermore, decision speed  
 266 correlated with choice accuracy, regardless of path length differences. Linking the human  
 267 hippocampal theta rhythm to processing demands, we found that hippocampal theta power  
 268 selectively corresponded to planning performance in mazes containing multiple choice points  
 269 during the MEG task. Here, we relate our findings to the extant hippocampal decision-making



270 literature and speculate on potential computational roles associated with the  
271 hippocampal/medial temporal lobe theta rhythm.

272 Our observation of increased hippocampal theta power during spatial decision-making  
273 adds to an emerging literature investigating the role of the hippocampal theta rhythm during  
274 decision-making in rodents (Johnson & Redish, 2007; Schmidt et al., 2013; Belchior et al.,  
275 2014; Wikenheiser & Redish, 2015; Pezzulo et al., 2017) and humans (Guitart-Masip et al.,  
276 2013). Yet, the specific role of the hippocampal theta rhythm in planning has remained unclear;  
277 despite recent evidence relating the rodent (Miller et al., 2017) and human hippocampus  
278 (Kaplan et al., 2017a) to planning. Additional support for a hippocampal role in planning comes  
279 from evidence that hippocampal neurons code the distance to goal locations (Ekstrom et al.,  
280 2003; Villette et al., 2015; Sarel et al., 2017; Watrous et al., 2018). Furthermore, Wikenheiser  
281 and Redish (2015) found that firing of place cell sequences coupled to the hippocampal theta  
282 rhythm extended further on journeys to distal goal locations. We parallel these findings by  
283 showing that hippocampal theta power was selectively related to efficient sequential planning,  
284 which further implicates the human hippocampal rhythm in prospective evaluation of upcoming  
285 choices during planning.

286 Differing from previous MEG/iEEG hippocampal theta studies that observe power  
287 increases related generally to enhanced task performance (Lega et al., 2012; Olsen et al., 2013;  
288 Backus et al., 2016; Heusser et al., 2016), we find hippocampal theta power effects associated  
289 with planning behavior in sequential, but not simpler mazes. Given the known relationship  
290 between the hippocampal theta rhythm and spatial trajectories, these findings may relate to  
291 sequential spatial decision-making that focuses on signifying a ‘location’ update within a  
292 sequence of choices. Supporting this explanation, recent work has suggested that the  
293 hippocampus can suppress noise in our everyday environment to focus on sub-goals during  
294 multi-step planning (Botvinick & Weinstein, 2014). Furthermore, biophysical models predict  
295 that the hippocampal theta rhythm can underlie this type of ‘sub-goaling’ within  
296 deep/sequential planning by updating our location from initial starting points to subsequent sub-  
297 goals (Kaplan & Friston, 2018).

298           Still, several aspects of our results remain unclear. For instance, an alternative  
299 explanation for not observing right hemisphere or non-sequential hippocampal theta power  
300 spatial planning effects could be that there are multiple theta sources corresponding to  
301 sequential and non-sequential RT effects (Miller et al., 2018), which MEG does not have  
302 adequate spatial resolution to resolve. Work comparing potential hemispheric or  
303 anterior/posterior differences in the hippocampal theta rhythm may help address this question  
304 (Miller et al., 2018). Furthermore, the direct relationship between behaviorally relevant  
305 hippocampal theta power changes and the reactivation of place cell sequences is not well  
306 characterized, since we are not measuring single-neuron activity. However, Watrous and  
307 colleagues (2018) recently observed that human hippocampal single units exhibit phase-locking  
308 to the theta rhythm and that this phase-locking encoded information about goal locations during  
309 virtual navigation. Work building on this line of research –using hippocampal iEEG recordings  
310 to inform whole-brain non-invasive MEG analyses – could provide a novel way to potentially  
311 answer questions about the role of the hippocampal theta rhythm in spatial decision-making.

312           Our task is reminiscent of perceptual decision-making paradigms and there is an  
313 emerging link between saccadic searches and the hippocampus. However, it should be noted  
314 that we only measured electrooculogram (EOG) signals during this task, not saccadic behavior.  
315 Future work can build on the growing literature linking visual exploration to movement-  
316 initiated hippocampal activity (MacIver et al., 2017). Of particular interest, Wang and  
317 colleagues (2018) found that the firing of single neurons in the human MTL related to  
318 successful visual searches for a target item embedded within an image. Moreover, recent studies  
319 of neural oscillations in the hippocampal formation in humans and non-human primates have  
320 related saccadic exploration of visual space to spatial exploration of the physical world (Jutras  
321 et al., 2013; Staudigl et al., 2018). Yet, how these findings relate to sequential decision-  
322 making/planning remains unclear.

323           We studied multi-step planning in an explicitly spatial domain, but it isn't known  
324 whether updating our 'location' to subsequent choice points relates more to the overhead visual  
325 searches of the maze or a more abstract decision space (Schiller et al., 2015; Kaplan et al.,

326 2017b). On one hand, there is mounting evidence of the type I movement-related rodent  
327 hippocampal theta rhythm extending to virtual (Ekstrom et al., 2003, 2005; Watrous et al.,  
328 2011; Kaplan et al., 2012; Bush et al., 2017; Watrous et al., 2018) and real-life navigation in  
329 humans (Aghajan et al., 2017; Bohbot et al., 2017). However, evidence from non-spatial  
330 domains is lacking. Potential clues may come from the investigation of the role of the  
331 hippocampal formation in imagined exploration of spatial environments (Byrne et al., 2007;  
332 Bellmund et al., 2016; Horner et al., 2016; Kaplan et al., 2017c). Indeed, the hippocampal theta  
333 rhythm has been observed during teleportation from one location to another (Vass et al., 2016)  
334 – providing further support for a role of the hippocampal theta rhythm in navigating more  
335 abstract spaces. Future work exploring the role of the hippocampal theta rhythm in both  
336 perceptual exploration (Jutras et al., 2013; Aronov et al., 2017) and prospective evaluation  
337 during abstract sequential decisions (Kaplan et al., 2017b), can determine how generalizable  
338 spatial navigation-related hippocampal theta effects are to other abstract spaces (Lisman &  
339 Redish, 2009).

340 In summary, our findings suggest that the human hippocampal theta rhythm plays an  
341 important role during spatial decision-making in novel environments. Namely, our data relate  
342 hippocampal theta power changes to sequential dependencies during spatial planning.  
343 Moreover, we present findings from a spatial decision-making task that more closely resembles  
344 perceptual decision-making than virtual navigation paradigms. This therefore leaves open the  
345 possibility that the human hippocampal theta rhythm also relates to prospective evaluation  
346 during multi-step decisions in non-spatial domains.

347

## 348 **Supplemental Information**

### 349 **Supplemental Experimental Procedures**

#### 350 *Participants*

#### 351 MEG

352 Twenty-four participants (14 female: mean age 23.5 yrs; SD of 3.49 years) gave written consent  
353 and were compensated for performing the experimental task, as approved by the local research

354 ethics committee at University College London in accordance with Declaration of Helsinki  
 355 protocols. All participants had normal or corrected-to-normal vision and reported to be in good  
 356 health with no prior history of neurological disease. Due to technical difficulties, two  
 357 participants were removed from our sample, leaving twenty-two participants in the behavioral  
 358 and MEG analyses presented here.

359 iEEG

360 Pre-surgical EEG recordings from 2 patients with pharmacoresistant focal-onset seizures and  
 361 hippocampal depth electrodes gave written consent, as approved by the local ethics committee  
 362 at Hospital del Mar and in accordance with Declaration of Helsinki protocols. One patient was  
 363 removed from analyses, because of visual difficulties due to an inferior occipital lesion, leaving  
 364 one patient with normal vision presented in the current analysis. A summary of the patient's  
 365 characteristics is given in Table 1.

| Age/<br>Sex | Handedness                  | Seizure<br>Onset/Freq                                       | Education | Epileptic<br>Focus                          | Drugs & Dosage                                                                                       | First-<br>language |
|-------------|-----------------------------|-------------------------------------------------------------|-----------|---------------------------------------------|------------------------------------------------------------------------------------------------------|--------------------|
| 23M         | R (but used<br>L due to IV) | 16 yo (1<br>seizure per<br>week and<br>now seizure<br>free) | Secondary | R<br><br>Temporobasal<br>(temporal<br>pole) | Eslicarbazepinole<br>1000 mg/per day;<br>leviteracetam<br>1500/2x day;<br>Perampanel 8<br>mg/per day | Spanish            |

366 Table 1. Patient information

367 All diagnostic and surgical procedures were approved by the clinical ethics committee of  
 368 Hospital del Mar in accordance with the principles expressed by the Declaration of Helsinki.  
 369 Electrode locations were determined solely by clinical criteria, ascertained by visual inspection  
 370 of post-implantation MRI scans using Slicer 4 (Fedorov et al., 2012; www.slicer.org) and  
 371 verified by an fMRI expert (R.Ka.). Patients were seizure free for at least 24 h before  
 372 participation and underwent an extensive neuropsychological evaluation to check for any  
 373 cognitive impairments.

374 *Experimental Design*

375 Stimuli were presented via a digital LCD projector on a screen (height, 32 cm; width, 42 cm;  
376 distance from participant, ~70 cm) inside a magnetically shielded room using the Cogent  
377 (<http://www.vislab.ucl.ac.uk/cogent.php>) toolbox running in MATLAB (Mathworks, Natick,  
378 MA, USA). Over the course of 220 trials, participants viewed 220 different mazes from a  
379 slightly tilted (overhead) viewpoint and later chose from first-person viewpoints within mazes  
380 generated using Blender (<http://www.blender.org>). All mazes had a starting location (a red  
381 square) towards the bottom of the maze and a goal location (a green square) further into the  
382 maze (Kaplan et al., 2017a). Mazes differed by hierarchical depth (number of paths to a goal  
383 location): there were 110 mazes with four possible routes (sequential/deep mazes) and a further  
384 110 non-sequential control mazes with two possible routes (shallow mazes).

385 In the scanner, participants were first presented with pictures of novel mazes (Fig. 1) of varying  
386 difficulty (from an overhead viewpoint) and then asked to determine the shortest path from a  
387 starting location (a red square) at the bottom of the screen to the goal location (a green square).  
388 The overhead view appeared on the screen for 3.25 s, after which a location (choice point) along  
389 the path was highlighted briefly for 250 ms with an orange circle. The choice point location  
390 could either be the starting location or a second (subsequent) choice point. Crucially,  
391 participants would only have to make a decision about one choice point for each trial.

392 At either choice point, it was necessary to choose between two possible directions, which could  
393 be left, forward, or right, with an additional option to select equal, if both routes were the same  
394 distance. No second choice points with two incorrect choices were ever highlighted, only a  
395 second choice point along the optimal path after the starting location could be highlighted  
396 (Kaplan et al., 2017a). After the choice point was highlighted, a “zoomed in” viewpoint of this  
397 location (always one square back and facing the same direction as the overhead viewpoint) was  
398 presented. Depending on the possible direction at the location, participants had less than 1,500  
399 ms (2,000 ms for the iEEG patient) to decide whether to go left, forward, right, or occasionally  
400 either direction. If no button press was made within the allotted duration, the trial counted as  
401 an incorrect trial and the experiment moved on to the 1500-ms inter-trial interval (ITI) phase.

402 Participants never received any feedback or reward for making the correct choice. As soon as  
403 participants chose a direction, the ITI phase of a trial began. Participants repeated this trial  
404 sequence 110 times per session, for a total of two sessions. Sessions lasted approximately 10–  
405 15 min. Session order was counterbalanced between participants.

406 All participants completed a brief practice session consisting of 40 mazes/trials before the  
407 experiment (on a laptop outside of the scanner). Sequential mazes contained two branch/choice  
408 points between routes further in the maze, and the path length to reach the two choice points  
409 further in the maze was always equal. Mazes had square tiled floors and were 8 x 8, 9 x 9, or  
410 10 x 10 squares in total area. In sequential mazes, we used a 3x3 factorial design. Path length  
411 differences were split between 2 (small difference), 4 (medium difference), or 6 (large  
412 difference) squares (for an example, see square tiles in the mazes presented in Fig 1) for the  
413 two paths at the starting location and a path length difference of 2, 4, or 6 squares at the optimal  
414 choice point in the maze. There was one catch trial for deep/sequential and shallow/control  
415 mazes in each session, each containing all equal path lengths (path length differences of 0). In  
416 sum, sequential maze trials could be 2, 2; 2, 4; 2, 6; 4, 2; 4, 4; 4, 6; 6, 2; 6, 4; 6, 6; (e.g. 4, 2  
417 would have a medium path length difference of 4 at the starting location, whereas the second  
418 choice point would have a small path length difference of 2). Half of the trials in the experiment  
419 were control/shallow mazes, which only contained one choice point at the red starting square.  
420 For these mazes, path length differences were split between 2, 4, and 6, with one catch trial per  
421 session having equal path lengths.

422

#### 423 *iEEG recordings and artifact detection*

424 All recordings were performed using a standard clinical EEG system (XLTEK, subsidiary of  
425 Natus Medical, Pleasanton, CA) with a 500 Hz sampling rate. A unilateral implantation was  
426 performed accordingly, using 15 intracerebral electrodes (Dixi Médical, Besançon, France;  
427 diameter: 0.8 mm; 5 to 15 contacts, 2 mm long, 1.5 mm apart) that were stereotactically inserted  
428 using robotic guidance (ROSA, Medtech Surgical, New York, NY).

429 Intracranial EEG signals were processed in the referential recording configuration (i.e., each  
430 signal was referred to a common reference; Tauste Campo et al., 2018). All recordings were  
431 subjected to a zero phase, 400th order finite impulse response (FIR) band-pass filter to focus  
432 on our frequency range of interest (0.5-48 Hz) and remove the effect of alternating current  
433 (Bush et al., 2017). Audio triggers produced by the stimulus presentation laptop were recorded  
434 on the monitoring system, allowing the EEG to be aligned with task information sampled at 25  
435 Hz.

436 Analysis of EEG recordings focused on the 3.25 s planning periods with an additional 1.5 s  
437 baseline prior to trial onset (ITI period). All trials that included interictal spikes (IIS) or other  
438 artifacts, either within the period of interest or during the padding windows, were excluded  
439 from all analyses presented here. A 500 ms padding window was used at either end of planning  
440 period time series to minimize edge effects in subsequent analyses.

#### 441 *iEEG Time-Frequency Analysis*

442 Estimates of dynamic oscillatory power during periods of interest were obtained by convolving  
443 the EEG signal with a seven-cycle Morlet wavelet and squaring the absolute value of the  
444 convolved signal. The wavelet transform was preferred to the Fourier transform as it does not  
445 assume stationarity in EEG recordings. To generate power spectra, the mean of dynamic  
446 oscillatory power estimates was taken over the time window of interest in the deepest contact  
447 in each hippocampal electrode. To perform baseline correction on time–frequency data for  
448 display purposes, power values were averaged across ITI periods for each frequency band, and  
449 those average values were subtracted from the power values at each time point in the planning  
450 period (Bush et al., 2017). To examine changes in oscillatory power within specific frequency  
451 bands and assess correlations among oscillatory power in each trial with RT, dynamic estimates  
452 of oscillatory power were calculated over the time and frequency windows of interest. Power  
453 values were then averaged across both hippocampal contacts to provide a single value at each  
454 time and frequency point for the patient.

#### 455 *MEG recording and preprocessing*

456 Data were recorded continuously from 274 axial gradiometers using a CTF Omega whole-head  
457 system at a sampling rate of 600 Hz in third-order gradient configuration. Participants were also  
458 fitted with four electroculogram (EOG) electrodes to measure vertical and horizontal eye  
459 movements. MEG data analyses made use of custom made Matlab scripts, SPM8 &12  
460 (Wellcome Centre for Human Neuroimaging, London), and Fieldtrip (Litvak et al., 2011;  
461 Oostenveld et al., 2011). For preprocessing, MEG data was epoched into 2s baseline periods  
462 prior to the planning phase for each of the nine sequential planning conditions of interest and  
463 the three non-sequential planning control conditions. Trials were visually inspected, with any  
464 trial featuring head movement or muscular artefacts being removed.

#### 465 *MEG Source Reconstruction*

466 The linearly constrained minimum variance (LCMV) scalar beamformer spatial filter algorithm  
467 was used to generate source activity maps in a 10-mm grid (Barnes et al., 2003). Coregistration  
468 to MNI coordinates was based on nasion, left and right preauricular fiducial points. The forward  
469 model was derived from a single-shell model (Nolte, 2003) fit to the inner skull surface of the  
470 inverse normalized SPM template. The beamformer source reconstruction algorithm consists  
471 of two stages: first, based on the data covariance and lead field structure, weights are calculated  
472 which linearly map sensor data to each source location; and second, a summary statistic based  
473 on the mean oscillatory power between experimental conditions is calculated for each voxel.

474 Due to the proximity of frontal and anterior medial temporal lobe regions to the eyes, we wished  
475 to control for any possible influence of EOG muscular artefacts during the planning phase on  
476 estimates of oscillatory power. We therefore computed the variance of two simultaneously  
477 recorded EOG signals across each planning phase and removed any covariance between these  
478 EOG variance values and oscillatory power measurements across voxels by linear regression  
479 (Kaplan et al., 2014, 2017c). This left ‘residual’ oscillatory power measurements for all trials  
480 whose variance could not be accounted for by changes in the EOG signal between trials, and  
481 these residual values were used as summary images for subsequent analyses. RT was included  
482 as an additional nuisance regressor for the theta power source analysis investigating the effect



483 of path length differences at different choice points. Including RT as a nuisance regressor  
484 specifically for this analysis helped determine whether there were any residual hippocampal  
485 theta power effects related to choice point demands during the planning period.

#### 486 *Statistical Analyses*

487 There were two main periods of interest, the 1.5s ITI and 3.25s planning phase. For each of the  
488 9 sequential planning regressors of interest (i.e., maze with a small, medium, or large path  
489 length at the second and first choice points), there were parametric regressors based on RT and  
490 accuracy (whether the choice was correctly answered; 1=incorrect choice; 2=correct choice).  
491 Inferences about these effects were based upon t- and F-tests using the standard summary  
492 statistic approach for second level random effects analysis.

493 A peak voxel significance threshold of  $p < 0.05$  FWE corrected for multiple comparisons was  
494 used for MEG source analyses. Given the previously hypothesized role of the hippocampus  
495 theta rhythm in planning, we report whether peak-voxels in these regions survive small-volume  
496 correction for multiple comparisons ( $p < 0.05$ ) based on a bilateral ROI of the hippocampus  
497 (mask created using Neurosynth, Yarkoni et al., 2011). All images are displayed at the  $p < 0.001$   
498 uncorrected threshold for illustrative purposes. Additionally, only clusters containing a  
499 significant peak voxel are displayed.

500 Post hoc statistical analyses were conducted using 10-mm radius spheres around the respective  
501 peak voxel specified in the GLM analysis. This allowed us to compare the effects of different  
502 regressors of interest (e.g., to determine whether a second choice point demand effect was  
503 present in a region defined by an orthogonal main effect of RT). This ensured we did not make  
504 any biased inferences in our post hoc analyses.

505

#### 506 **References**

507

508 Aghajan Z, Schuette P, Fields TA, Tran ME, Siddiqui SM, Hasulak NR, Tcheng TK, Eliashiv  
509 D, Mankin EA, Stern J, Fried I, Suthana N (2017) Theta Oscillations in the Human Medial  
510 Temporal Lobe during Real-World Ambulatory Movement. *Curr Biol*, 27:3743-51.

511

512 Aronov, D., Nevers, R., and Tank, D.W. (2017). Mapping of a non-spatial dimension by the  
513 hippocampal-entorhinal circuit. *Nature* 543, 719-22.

514

515 Backus AR, Schoffelen JM, Szebényi S, Hanslmayr S, Doeller CF (2016) Hippocampal-  
516 Prefrontal Theta Oscillations Support Memory Integration. *Curr Biol*, 26:450–7.  
517  
518 Barnes GR, Hillebrand A. Statistical flattening of MEG beamformer images. *Hum Brain*  
519 *Mapp.* 2003;18:1–12.  
520  
521 Belchior H, Lopes-Dos-Santos V, Tort AB, Ribeiro S (2014) Increase in hippocampal theta  
522 oscillations during spatial decision making. *Hippocampus*, 24:693-702.  
523  
524 Bellmund JL, Deuker L, Navarro Schröder, Doeller CF (2016) Grid-cell representations in  
525 mental simulation. *Elife*, 5:e17089.  
526  
527 Bohbot VD, Copara MS, Gotman J, Ekstrom AD (2017) Low-frequency theta oscillations in  
528 the human hippocampus during real-world and virtual navigation. *Nat Commun*, 8:14415.  
529  
530 Botvinick M, Weinstein A (2014) Model-based hierarchical reinforcement learning and human  
531 action control. *Philos Trans R Soc Lond B Biol Sci*, 369  
532  
533 Bush D, Bisby JA, Bird CM, Gollwitzer S, Rodionov R, Diehl B, McEvoy AW, Walker MC,  
534 Burgess N (2017) Human hippocampal theta power indicates movement onset and distance  
535 travelled. *Proc Natl Acad Sci USA*, 114:12297-12302  
536  
537 Byrne P, Becker S, Burgess N (2007) Remembering the past and imagining the future: a neural  
538 model of spatial memory and imagery. *Psychol Rev*, 114:340-75.  
539  
540 Ekstrom AD, Kahana MJ, Caplan JB, Fields TA, Isham EA, Newman EL, Fried I (2003)  
541 Cellular networks underlying human spatial navigation. *Nature* 425:184-8  
542  
543 Ekstrom AD, Caplan JB, Ho E, Shattuck K, Fried I, Kahana MJ (2005) Human hippocampal  
544 theta activity during virtual navigation. *Hippocampus* **15**:881-9  
545  
546 Fedorov A, Beichel R, Kalpathy-Cramer J, Finet J, Fillon-Robin J-C, Pujol S, Bauer C,  
547 Jennings D, Fennessy FM, Sonka M, Buatti J, Aylward SR, Miller JV, Pieper S, Kikinis R  
548 (2012) 3D Slicer as an Image Computing Platform for the Quantitative Imaging Network. *Magn*  
549 *Reson Imaging* 30:1323-41.  
550  
551 Guitart-Masip M, Barnes GR, Horner A, Bauer M, Dolan RJ, Duzel E (2013) Synchronization  
552 of medial temporal lobe and prefrontal rhythms in human decision making. *J Neurosci* **33**:442-  
553 51.  
554  
555 Heusser AC, Poeppel D, Ezzyat Y, Davachi L (2016) Episodic sequence memory is supported  
556 by a theta-gamma phase code. *Nat Neurosci* **19**:1374-80  
557  
558 Horner AJ, Bisby JA, Zotow E, Bush D, Burgess N (2016) Grid-like Processing of Imagined  
559 Navigation. *Curr Biol*, 26:842-7.  
560  
561 Johnson A, Redish AD (2007) Neural ensembles in CA3 transiently encode paths forward of  
562 the animal at a decision point. *J Neurosci*, 27:12176-89.  
563  
564 Jutras MJ, Fries P, Buffalo EA (2013) Oscillatory activity in the monkey hippocampus during  
565 visual exploration and memory formation. *Proc Natl Acad Sci U.S.A.* 110:13144-9.  
566  
567 Kaplan R, Doeller CF, Barnes GR, Litvak V, Düzel E, Bandettini PA, Burgess N (2012)  
568 Movement-related theta rhythm in humans: coordinating self-directed hippocampal learning.  
569 *PLoS Biol*, 10:e1001267.

570  
571 Kaplan R, Bush D, Bonnefond M, Bandettini PA, Barnes GR, Doeller CF, Burgess N (2014)  
572 Medial prefrontal theta phase coupling during spatial memory retrieval. *Hippocampus*, 24:656-  
573 65.  
574  
575 Kaplan R, King J, Koster R, Penny WD, Burgess N, Friston KJ (2017a) The Neural  
576 Representation of Prospective Choice during Spatial Planning and Decisions. *PLoS Biol*,  
577 15:e1002588.  
578  
579 Kaplan R, Schuck NW, Doeller CF (2017b) The Role of Mental Maps in Decision-Making.  
580 *Trends Neurosci*, 40:256-59.  
581  
582 Kaplan R, Bush D, Bisby JA, Horner AJ, Meyer SS, Burgess N (2017c) Medial Prefrontal-  
583 Medial Temporal Theta Phase Coupling in Dynamic Spatial Imagery. *J Cogn Neurosci*, 29:507-  
584 19.  
585  
586 Kaplan R, Friston KJ (2018) Planning and navigation as active inference. *Biol Cybern*, Epub  
587 Online  
588  
589 Lega BC, Jacobs J, Kahana MJ (2012) Human hippocampal theta oscillations and the formation  
590 of episodic memories. *Hippocampus*, 22:748-61.  
591  
592 Lisman J, Redish AD (2009) Prediction, sequences and the hippocampus. *Philos Trans R Soc*  
593 *Lond B Biol Sci*, 364:1193-201.  
594  
595 Litvak V, Mattout J, Kiebel S, Phillips C, Henson R, Kilner J, Barnes G, Oostenveld R,  
596 Daunizeau J, Flandin G, Penny W, Friston K (2011) EEG and MEG data analysis in SPM8.  
597 *Comput Intell Neurosci.*, 2011:852961.  
598  
599 MacIver MA, Schmitz L, Muga U, Murphey TD, Mobley CD (2017) Massive increase in  
600 visual range preceded the origin of terrestrial vertebrates. *Proc Natl Acad Sci USA*, 114:E2375-  
601 E2384  
602  
603 Miller J, Watrous AJ, Tsitsiklis M, Lee SA, Sheth SA, Schevon CA, Smith EH, Sperling MR,  
604 Sharan A, Asadi-Pooya AA, Worrell GA, Meisenhelter S, Inman CS, Davis KA, Lega B,  
605 Wanda PA, Das SR, Stein JM, Gorniak R, Jacobs J (2018) Lateralized hippocampal oscillations  
606 underlie distinct aspects of human spatial memory and navigation. *Nat Commun*, 9:2423.  
607  
608 Miller KJ, Botvinick MM, Brody CD (2017) Dorsal hippocampus contributes to model-  
609 planning. *Nat Neurosci*, 20:1269-76.  
610  
611 Nolte G (2003) The magnetic lead field theorem in the quasi-static approximation and its use  
612 for magnetoencephalography forward calculation in realistic volume conductor. *Phys Med Biol*  
613 48:3637–3652.  
614  
615 O’Keefe J, Recce ML (1993) Phase relationship between hippocampal place units and the EEG  
616 theta rhythm. *Hippocampus*, 3:317-30.  
617  
618 Olsen RK, Rondina Ii R., Riggs L, Meltzer JA, Ryan JD (2013) Hippocampal and  
619 neocortical oscillatory contributions to visuospatial binding and comparison. *Journal of*  
620 *Experimental Psychology: General* 142:1335-45.  
621

622 Oostenveld R, Fries P, Maris E, Schoffelen JM (2011) FieldTrip: Open source software for  
623 advanced analysis of MEG, EEG, and invasive electrophysiology data. *Comput Intell Neurosci*,  
624 2011:156869.  
625  
626 Pezzulo G, Kemere C, van der Meer MAA (2017) Internally generated hippocampal sequences  
627 as a vantage point to probe future-oriented cognition. *Ann NY Acad Sci*, 1396:144-65.  
628  
629 Sarel A, Finkelstein A, Las L, Ulanovsky N (2017) Vectorial representation of spatial goals in  
630 the hippocampus of bats. *Science* 355:176-80  
631  
632 Schiller, D., Eichenbaum, H., Buffalo, E.A., Davachi, L., Foster, D.J., Leutgeb, S., and  
633 Ranganath, C. (2015). Memory and Space: Towards an Understanding of the Cognitive Map. *J*  
634 *Neurosci.* 35, 13904-11.  
635  
636 Schmidt B, Hinman JR, Jacobson TK, Szkudlarek E, Argraves M, Escabi MA, Markus EJ  
637 (2013) Dissociation between dorsal and ventral hippocampal theta oscillations during decision-  
638 making. *J Neurosci* 33:6212-24.  
639  
640 Stachenfeld KL, Botvinick MM, Gershman SJ (2017) The hippocampus as a predictive map.  
641 *Nat Neurosci*, 20:1643-53.  
642  
643 Staudigl T, Leszczynski M, Sheth SA, Schroeder CE, Jensen O, Doeller CF (2018)  
644 Hexadirectional modulation of high-frequency electrophysiological activity in the human  
645 anterior medial temporal lobe maps visual space. *Curr Biol*  
646  
647 Tauste Campo A, Principe A, Ley M, Rocamora R, Deco G (2018) Degenerate time-dependent  
648 network dynamics anticipate seizures in human epileptic brain. *PLoS Biol*, 16:e20002580.  
649  
650 Vanderwolf CH (1969) Hippocampal electrical activity and voluntary movement in the rat.  
651 *Electroencephalogr Clin Neurophysiol.* 26:407-18.  
652  
653 Vass LK, Copara MS, Seyal M, Shalvaie K, Farias ST, Shen PY, Ekstrom AD (2016)  
654 Oscillations Go the Distance: Low-Frequency Human Hippocampal Oscillations Code Spatial  
655 Distance in the Absence of Sensory Cues during Teleportation. *Neuron*, 89:1180-86  
656  
657 Villette V, Malvache A, Tressard T, Dupuy N, Cossart R (2015) Internally Recurring  
658 Hippocampal Sequences as a Population Template of Spatiotemporal Information. *Neuron*,  
659 88:357-66.  
660  
661 Wang S, Mamelak AN, Adolphs R, Rutishauser U (2018) Encoding of Target Detection during  
662 Visual Search by Single Neurons in the Human Brain. *Curr Biol*.  
663  
664 Watrous AJ, Fried I, Ekstrom AD (2011) Behavioral correlates of human hippocampal delta  
665 and theta oscillations during navigation. *J Neurophysiol*, 105:1747-55.  
666  
667 Watrous AJ, Tandon N, Conner CR, Pieters T, Ekstrom AD (2013) Frequency-specific network  
668 connectivity increases underlie accurate spatiotemporal memory retrieval. *Nat Neurosci*,  
669 16:349-58.  
670  
671 Watrous AJ, Miller J, Qasim SE, Fried I, Jacobs J (2018) Phase-tuned neuronal firing encodes  
672 human contextual representations for navigational goals. *Elife*, 7  
673  
674 Wikenheiser AM, Redish AD (2015) Hippocampal theta sequences reflects current goals. *Nat*  
675 *Neurosci*, 18:289-94.  
676

677 Yarkoni, T., Poldrack, R.A., Nichols, T.E., Van Essen, D.C., and Wager, T.D. (2011). Large-  
 678 scale automated synthesis of human functional neuroimaging data. *Nat Methods*. 8, 665-70.  
 679  
 680  
 681  
 682  
 683  
 684  
 685  
 686 **Supplemental Figures**  
 687  
 688  
 689

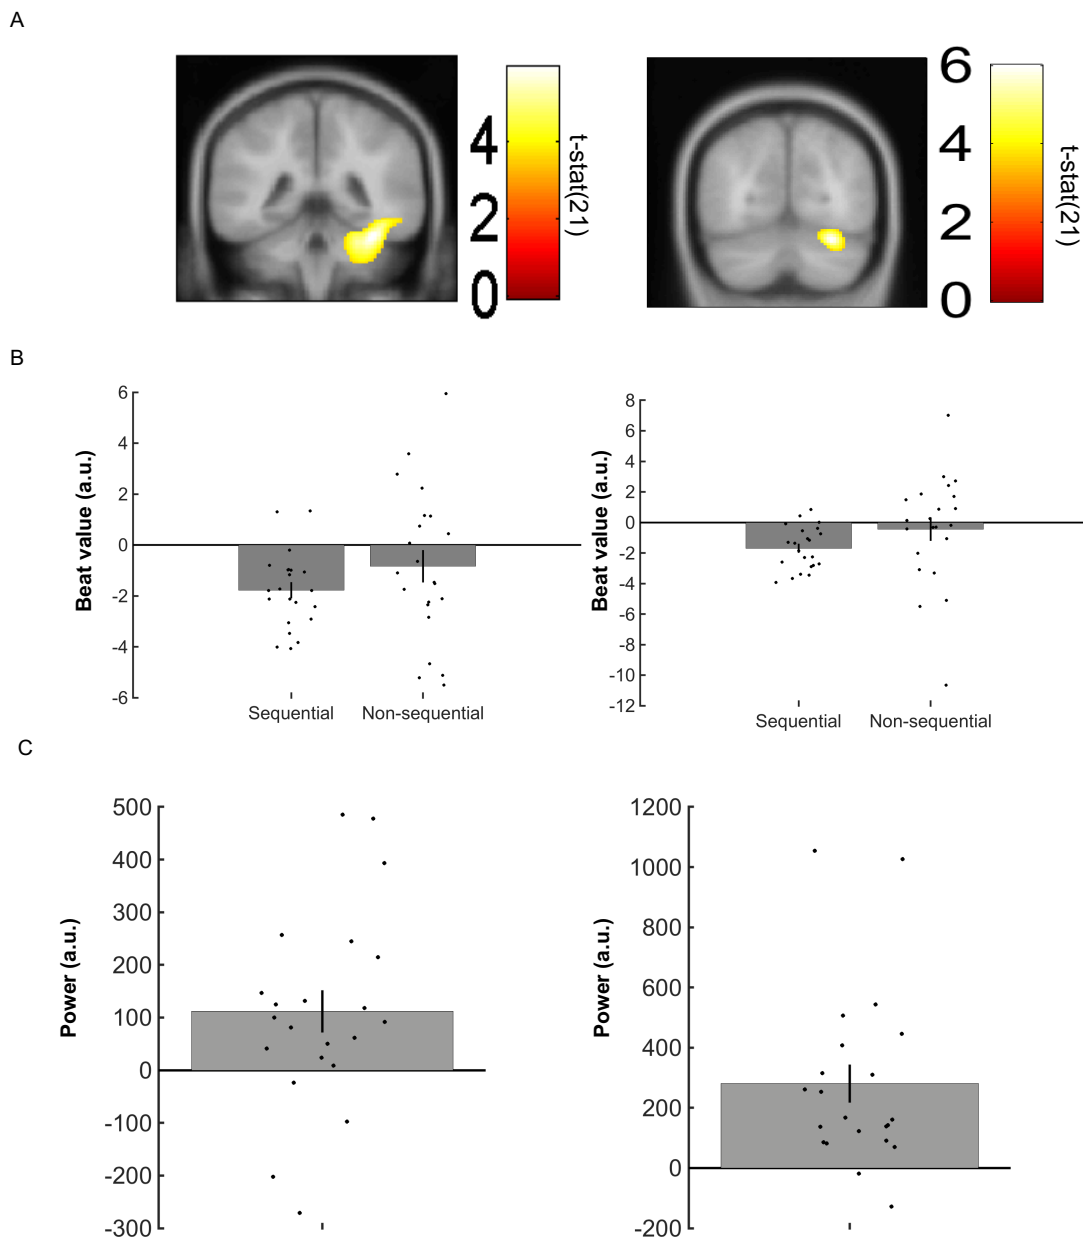

690 **Fig. S1 Additional reaction time correlations with MEG theta and alpha power**  
 691 A. Linearly Constrained Minimum Variance (LCMV) beamformer source reconstruction  
 692 images. Left: Shows significant 4-8 Hz right ventral temporal cortex theta power source  
 693 negative correlation with RT (x:36, y:-42, z:-26) in 22 healthy participants. Right: Shows  
 694 significant 9-12 Hz right occipital/cerebellar cortex alpha power source negative correlation  
 695

696 with RT (x:28, y:-70, z:-22). Images displayed at the threshold of  $p < 0.001$  uncorrected for  
697 visualization purposes. B. Left: Data from a 10 mm sphere around right ventral temporal peak  
698 voxel from RT contrast for both sequential and non-sequential/control planning trials. Right:  
699 Data from a 10 mm sphere around right occipital peak voxel from RT contrast for both  
700 sequential and non-sequential/control planning trials. C. Left: Data from a 10 mm sphere  
701 around right ventral temporal peak voxel from RT contrast showing increased theta power  
702 during planning phase versus the ITI period. Right: Data from a 10 mm sphere around right  
703 occipital peak voxel from RT contrast showing increased theta power during planning phase  
704 versus the ITI period. All error bars show  $\pm$  SEM.
